# Supplementary material
Source: PubMed Central journal article supplement (PMC4105005)
Supplement: NIHMS590480-supplement-supplement_1.pdf [file NIHMS590480-supplement-supplement_1.pdf]

Supplemental Table 1.

Correlations among DSM-5 traits

| DSM-5 Traits |      |      |      |      |     |      |      |      |     |      |     |     |     |      |      |      |      |     |     |     |      |     |     |     |     |      |      |     |     |     |
|--------------|------|------|------|------|-----|------|------|------|-----|------|-----|-----|-----|------|------|------|------|-----|-----|-----|------|-----|-----|-----|-----|------|------|-----|-----|-----|
|              | NEG  | DET  | ANT  | DIS  | PSY | EMO  | ANX  | INS  | PER | SUB  | HOS | DEP | SUS | RAF  | WD   | ANH  | INT  | MAN | DEC | GRA | ATT  | CAL | IRR | IMP | DIS | RSK  | RIG  | UB  | ECC | CPD |
| NEG          | -    | .74  | .56  | .38  | .56 | .83  | .84  | .72  | .70 | .47  | .67 | .85 | .67 | .09  | .49  | .74  | .20  | .29 | .54 | .21 | .24  | .37 | .55 | .49 | .66 | .21  | .47  | .35 | .52 | .62 |
| DET          | .48  | -    | .37  | .27  | .57 | .44  | .70  | .36  | .51 | .39  | .45 | .88 | .64 | .56  | .87  | .89  | .55  | .16 | .46 | .18 | -.03 | .37 | .47 | .28 | .55 | .06  | .27  | .39 | .54 | .58 |
| ANT          | .44  | .15  | -    | .51  | .45 | .42  | .33  | .39  | .48 | .15  | .76 | .34 | .47 | .22  | .28  | .34  | .11  | .80 | .86 | .63 | .64  | .80 | .64 | .55 | .48 | .41  | .28  | .36 | .39 | .47 |
| DIS          | .44  | .08  | .59  | -    | .45 | .34  | .14  | .37  | .34 | .00  | .41 | .36 | .15 | .14  | .14  | .31  | -.09 | .42 | .45 | .18 | .39  | .39 | .75 | .83 | .66 | .78  | -.10 | .30 | .42 | .47 |
| PSY          | .46  | .29  | .27  | .32  | -   | .48  | .41  | .37  | .55 | .29  | .35 | .51 | .51 | .37  | .46  | .46  | .21  | .32 | .47 | .30 | .18  | .37 | .52 | .50 | .53 | .42  | .44  | .84 | .94 | .90 |
| EMO          | .74  | .18  | .44  | .49  | .29 | -    | .55  | .62  | .53 | .37  | .51 | .60 | .45 | -.14 | .26  | .50  | .08  | .25 | .38 | .16 | .29  | .20 | .46 | .51 | .55 | .24  | .46  | .32 | .43 | .54 |
| ANX          | .60  | .43  | .01  | .08  | .36 | .26  | -    | .51  | .52 | .43  | .46 | .75 | .56 | .25  | .51  | .68  | .21  | .16 | .41 | .14 | .04  | .19 | .29 | .23 | .42 | .04  | .38  | .20 | .39 | .47 |
| INS          | .79  | .32  | .38  | .45  | .37 | .56  | .34  | -    | .46 | .37  | .36 | .51 | .36 | -.03 | .14  | .38  | -.07 | .19 | .36 | .15 | .33  | .24 | .42 | .45 | .48 | .23  | .28  | .20 | .33 | .44 |
| PER          | .55  | .24  | .23  | .08  | .30 | .19  | .38  | .39  | -   | .29  | .49 | .50 | .43 | .24  | .37  | .47  | .17  | .24 | .45 | .25 | .24  | .39 | .57 | .37 | .62 | .30  | .60  | .40 | .50 | .57 |
| SUB          | .52  | .38  | -.12 | .08  | .19 | .17  | .42  | .41  | .28 | -    | .10 | .39 | .23 | .22  | .33  | .31  | .14  | .05 | .21 | .11 | .11  | .08 | .13 | .09 | .27 | -.11 | .26  | .16 | .29 | .30 |
| HOS          | .63  | .32  | .78  | .47  | .25 | .54  | .17  | .45  | .30 | .02  | -   | .45 | .51 | .11  | .33  | .48  | .09  | .48 | .57 | .31 | .28  | .60 | .54 | .49 | .56 | .25  | .34  | .19 | .32 | .41 |
| DEP          | .66  | .63  | .17  | .24  | .29 | .41  | .37  | .47  | .25 | .34  | .37 | -   | .52 | .26  | .62  | .88  | .32  | .14 | .42 | .08 | .04  | .26 | .47 | .36 | .57 | .13  | .21  | .31 | .48 | .54 |
| SUS          | .66  | .65  | .43  | .26  | .42 | .43  | .41  | .43  | .26 | .16  | .52 | .41 | -   | .23  | .50  | .48  | .30  | .29 | .45 | .29 | .12  | .38 | .28 | .29 | .36 | .12  | .41  | .45 | .45 | .47 |
| RAF          | -.07 | .68  | .07  | -.11 | .09 | -.21 | .15  | -.05 | .12 | .05  | .10 | .13 | .26 | -    | .62  | .34  | .32  | .15 | .26 | .26 | -.07 | .31 | .25 | .00 | .21 | .08  | .10  | .29 | .35 | .33 |
| WD           | .33  | .83  | -.09 | -.03 | .19 | .06  | .41  | .24  | .17 | .48  | .08 | .44 | .38 | .56  | -    | .71  | .46  | .11 | .37 | .16 | -.16 | .35 | .36 | .12 | .42 | -.05 | .23  | .31 | .44 | .46 |
| ANH          | .32  | .86  | .07  | .07  | .14 | .10  | .31  | .23  | .12 | .31  | .17 | .51 | .43 | .57  | .64  | -    | .35  | .16 | .44 | .04 | -.05 | .29 | .47 | .30 | .59 | .04  | .21  | .24 | .44 | .52 |
| INT          | .21  | .79  | -.02 | -.09 | .16 | -.02 | .25  | .06  | .16 | .33  | .13 | .34 | .33 | .53  | .65  | .65  | -    | .03 | .15 | .11 | -.03 | .12 | .11 | .02 | .14 | -.12 | .17  | .24 | .15 | .23 |
| MAN          | .29  | .04  | .81  | .58  | .18 | .38  | -.06 | .33  | .04 | -.12 | .53 | .08 | .26 | .01  | -.13 | .06  | -.12 | -   | .71 | .53 | .51  | .53 | .45 | .49 | .27 | .39  | .17  | .31 | .22 | .38 |
| DEC          | .38  | .11  | .78  | .54  | .22 | .43  | -.01 | .39  | .11 | .07  | .54 | .14 | .28 | .03  | -.07 | .06  | .03  | .80 | -   | .37 | .42  | .69 | .64 | .42 | .47 | .28  | .17  | .37 | .40 | .52 |
| GRA          | .19  | .09  | .78  | .31  | .16 | .16  | -.05 | .10  | .23 | -.23 | .50 | .08 | .30 | .11  | -.12 | .04  | .00  | .47 | .41 | -   | .38  | .48 | .24 | .22 | .13 | .29  | .29  | .34 | .21 | .32 |
| ATT          | .27  | -.13 | .73  | .41  | .27 | .25  | -.07 | .32  | .23 | -.13 | .46 | .08 | .12 | -.13 | -.29 | -.13 | -.22 | .46 | .46 | .55 | -    | .26 | .32 | .44 | .20 | .40  | .08  | .23 | .18 | .11 |

|     |     |     |      |      |     |      |     |      |     |      |      |      |     |      |      |     |      |      |      |      |      |      |      |      |      |      |      |     |     |     |
|-----|-----|-----|------|------|-----|------|-----|------|-----|------|------|------|-----|------|------|-----|------|------|------|------|------|------|------|------|------|------|------|-----|-----|-----|
| CAL | .21 | .27 | .68  | .41  | .12 | .22  | .08 | .11  | .06 | -.13 | .46  | -.02 | .49 | .24  | .15  | .18 | .12  | .53  | .47  | .55  | .23  | -    | .59  | .38  | .36  | .26  | .21  | .24 | .35 | .39 |
| IRR | .41 | .12 | .52  | .79  | .26 | .43  | .04 | .39  | .10 | .12  | .44  | .29  | .21 | -.11 | .03  | .05 | .03  | .54  | .56  | .25  | .33  | .29  | -    | .62  | .72  | .44  | .16  | .35 | .46 | .59 |
| IMP | .47 | .05 | .60  | .88  | .27 | .55  | .05 | .48  | .09 | .03  | .51  | .29  | .26 | -.14 | -.09 | .04 | -.16 | .57  | .52  | .33  | .46  | .35  | .66  | -    | .51  | .73  | .18  | .36 | .46 | .50 |
| DIS | .41 | .17 | .32  | .70  | .45 | .26  | .30 | .37  | .31 | .16  | .31  | .22  | .21 | -.02 | .12  | .13 | .07  | .28  | .24  | .15  | .25  | .20  | .55  | .48  | -    | .31  | .27  | .31 | .49 | .61 |
| RSK | .43 | .12 | .61  | .86  | .24 | .49  | .00 | .45  | .10 | .08  | .50  | .23  | .29 | -.05 | .00  | .13 | -.08 | .61  | .54  | .37  | .35  | .46  | .62  | .83  | .43  | -    | .21  | .34 | .39 | .40 |
| RIG | .06 | .15 | -.18 | -.57 | .02 | -.10 | .06 | -.02 | .30 | .08  | -.02 | .15  | .00 | .10  | .16  | .10 | .17  | -.19 | -.16 | -.07 | -.16 | -.25 | -.20 | -.35 | -.22 | -.37 | -    | .34 | .38 | .49 |
| UB  | .44 | .24 | .25  | .30  | .89 | .30  | .29 | .37  | .20 | .14  | .26  | .28  | .46 | .01  | .16  | .10 | .05  | .19  | .21  | .11  | .24  | .12  | .27  | .27  | .37  | .24  | .01  | -   | .68 | .71 |
| ECC | .34 | .28 | .17  | .21  | .89 | .18  | .30 | .26  | .30 | .17  | .15  | .25  | .30 | .13  | .17  | .16 | .22  | .04  | .09  | .16  | .24  | .05  | .18  | .16  | .38  | .15  | .06  | .65 | -   | .75 |
| CPD | .46 | .27 | .31  | .34  | .94 | .30  | .39 | .37  | .30 | .21  | .27  | .24  | .38 | .10  | .18  | .11 | .17  | .25  | .29  | .17  | .27  | .16  | .25  | .29  | .48  | .26  | -.02 | .77 | .80 | -   |

*Note:* Correlations below the diagonal are from the clinician ratings; Correlations above the diagonal are from the self-report PID-5. NEG = Negative Affectivity; DET = Detachment; ANT = Antagonism; DIS = Disinhibition; PSY = Psychoticism; EMO = Emotional Lability; ANX = Anxiousness; INS = Separation Insecurity; PER = Perseveration; SUB = Submissiveness; HOS = Hostility; DEP = Depressivity; SUS = Suspiciousness; RAF = Restricted Affectivity; W = Withdrawal; ANH = Anhedonia; INT = Intimacy Avoidance; MAN = Manipulativeness; DEC = Deceitfulness; GRA = Grandiosity; ATT = Attention Seeking; CAL = Callousness; IRR = Irresponsibility; IMP = Impulsivity; DIS = Distractibility; RSK = Risk Taking; RIG = Rigid Perfectionism; UB = Unusual Beliefs and Experiences; ECC = Eccentricity; CPD = Cognitive and Perceptual Dysregulation.

Supplemental Table 2.

## Correlations between clinician-rated and self-reported DSM-5 personality facets

| CR  | PID-5 Self-Reported Traits |      |      |     |      |      |      |     |      |      |      |      |      |      |      |      |      |      |      |      |      |     |      |      |      |
|-----|----------------------------|------|------|-----|------|------|------|-----|------|------|------|------|------|------|------|------|------|------|------|------|------|-----|------|------|------|
|     | EMO                        | ANX  | INS  | PER | SUB  | HOS  | DEP  | SUS | RAF  | WD   | ANH  | INT  | MAN  | DEC  | GRA  | ATT  | CAL  | IRR  | IMP  | DIS  | RSK  | RIG | UB   | ECC  | CPD  |
| EMO | .55                        | .26  | .40  | .32 | .12  | .38  | .41  | .36 | -.18 | .16  | .27  | .05  | .30  | .23  | .17  | .22  | .23  | .38  | .41  | .32  | .20  | .14 | .30  | .24  | .33  |
| ANX | .32                        | .47  | .29  | .39 | .24  | .25  | .43  | .39 | .28  | .39  | .38  | .17  | -.03 | .13  | .15  | -.19 | .16  | .21  | .02  | .36  | -.06 | .29 | .30  | .35  | .46  |
| INS | .49                        | .35  | .60  | .44 | .29  | .35  | .44  | .38 | -.04 | .19  | .32  | .08  | .19  | .28  | .13  | .22  | .18  | .41  | .42  | .21  | .26  | .32 | .33  | .41  | .41  |
| PER | .26                        | .29  | .21  | .32 | .25  | .30  | .22  | .31 | .12  | .18  | .22  | -.03 | -.07 | .06  | .13  | .01  | .00  | .08  | .03  | .26  | .02  | .29 | .20  | .17  | .19  |
| SUB | .21                        | .27  | .30  | .19 | .40  | -.01 | .38  | .28 | .18  | .29  | .39  | .17  | -.07 | .11  | -.03 | -.21 | -.04 | .13  | .04  | .21  | -.10 | .17 | .23  | .24  | .31  |
| HOS | .32                        | .21  | .29  | .35 | -.01 | .62  | .32  | .38 | -.02 | .16  | .28  | .06  | .33  | .29  | .23  | .31  | .37  | .40  | .38  | .32  | .25  | .23 | .22  | .17  | .18  |
| DEP | .48                        | .45  | .46  | .30 | .29  | .30  | .62  | .40 | .13  | .43  | .62  | .35  | .11  | .34  | .18  | .12  | .19  | .32  | .24  | .46  | .11  | .19 | .25  | .28  | .39  |
| SUS | .24                        | .31  | .24  | .26 | .03  | .45  | .32  | .67 | .10  | .37  | .33  | .19  | .26  | .33  | .31  | .07  | .34  | .19  | .22  | .26  | .12  | .26 | .34  | .33  | .34  |
| RAF | -.14                       | .12  | -.20 | .03 | -.03 | .12  | .11  | .16 | .36  | .42  | .31  | .12  | .03  | .10  | .07  | -.17 | .11  | .12  | .01  | .14  | .00  | .07 | .02  | .14  | .12  |
| WD  | .14                        | .41  | .14  | .23 | .27  | .20  | .45  | .38 | .44  | .68  | .58  | .25  | .02  | .22  | .15  | -.29 | .19  | .20  | .03  | .31  | -.02 | .24 | .23  | .37  | .38  |
| ANH | .23                        | .43  | .22  | .13 | .19  | .25  | .54  | .38 | .28  | .54  | .66  | .31  | .11  | .21  | .14  | -.14 | .08  | .18  | .12  | .28  | .00  | .19 | .17  | .27  | .39  |
| INT | .01                        | .31  | .02  | .05 | .14  | .15  | .45  | .36 | .28  | .60  | .54  | .39  | -.06 | .13  | .02  | -.30 | .11  | .07  | -.08 | .13  | -.21 | .11 | .10  | .15  | .19  |
| MAN | .22                        | .03  | .21  | .22 | .00  | .31  | .08  | .23 | .02  | .03  | .00  | .04  | .41  | .32  | .22  | .37  | .34  | .44  | .42  | .24  | .36  | .16 | .22  | .23  | .23  |
| DEC | .30                        | .15  | .25  | .25 | .11  | .35  | .18  | .31 | .03  | .12  | .10  | .14  | .40  | .43  | .22  | .36  | .40  | .47  | .39  | .26  | .27  | .23 | .31  | .26  | .25  |
| GRA | .01                        | .04  | .01  | .11 | -.02 | .28  | .00  | .15 | .04  | -.03 | -.05 | -.03 | .40  | .24  | .36  | .33  | .25  | .15  | .25  | .09  | .33  | .08 | .12  | .15  | .01  |
| ATT | .21                        | -.09 | .23  | .04 | .02  | .15  | -.09 | .02 | -.23 | -.22 | -.21 | -.05 | .21  | .09  | .16  | .52  | .04  | .20  | .34  | .09  | .31  | .05 | .15  | .09  | -.01 |
| CAL | .07                        | .07  | .03  | .11 | .02  | .47  | .10  | .31 | .24  | .18  | .09  | .05  | .51  | .40  | .42  | .23  | .53  | .31  | .36  | .16  | .29  | .14 | .23  | .27  | .26  |
| IRR | .25                        | .07  | .32  | .32 | .01  | .33  | .27  | .33 | .09  | .15  | .21  | .19  | .29  | .36  | .23  | .36  | .41  | .61  | .49  | .40  | .33  | .05 | .29  | .23  | .25  |
| IMP | .34                        | .13  | .36  | .28 | .08  | .34  | .32  | .23 | -.01 | .08  | .22  | .12  | .35  | .31  | .15  | .44  | .35  | .53  | .64  | .37  | .50  | .04 | .29  | .30  | .31  |
| DIS | .28                        | .12  | .31  | .26 | .03  | .29  | .28  | .24 | .14  | .13  | .18  | .09  | .04  | .14  | .22  | .14  | .23  | .41  | .39  | .48  | .29  | .03 | .31  | .30  | .36  |
| RSK | .31                        | .22  | .37  | .28 | .16  | .35  | .35  | .35 | .13  | .15  | .24  | .09  | .42  | .34  | .25  | .39  | .33  | .50  | .68  | .33  | .55  | .12 | .42  | .38  | .40  |
| RIG | .15                        | .04  | -.08 | .18 | .08  | .03  | -.02 | .11 | -.14 | .09  | .11  | .04  | -.16 | -.13 | .04  | -.22 | -.11 | -.20 | -.25 | -.02 | -.25 | .39 | -.10 | -.06 | -.06 |
| UB  | .25                        | -.03 | .17  | .23 | -.15 | .14  | .14  | .33 | .01  | .12  | .10  | .20  | .18  | .25  | .24  | .18  | .17  | .21  | .26  | .13  | .27  | .19 | .60  | .37  | .35  |
| ECC | .13                        | .03  | .05  | .10 | -.06 | .04  | .19  | .22 | -.04 | .03  | .13  | .10  | -.08 | .06  | .02  | .05  | -.03 | .08  | .09  | .12  | .18  | .06 | .43  | .35  | .26  |
| CPD | .24                        | .05  | .16  | .20 | -.03 | .12  | .20  | .30 | -.02 | .09  | .12  | .12  | .06  | .21  | .11  | .11  | .13  | .21  | .24  | .24  | .25  | .15 | .57  | .46  | .45  |

Note: All correlations  $>|.24|$  are significant at  $p < .01$ ; **Bolded Correlations** = convergent correlation is strongest within that row; Underlined Correlations = convergent correlation is strongest within that column; CR = Clinician Rated; EMO=Emotional Lability; ANX = Anxiousness; INS = Separation Insecurity; PER = Perseveration; SUB = Submissiveness; HOS = Hostility; DEP = Depressivity; SUS = Suspiciousness; RAF = Restricted Affectivity; W = Withdrawal; ANH = Anhedonia; INT = Intimacy Avoidance; MAN = Manipulativeness; DEC = Deceitfulness; GRA = Grandiosity; ATT = Attention Seeking; CAL = Callousness; IRR = Irresponsibility; IMP = Impulsivity; DIS = Distractibility; RSK = Risk Taking; RIG = Rigid Perfectionism; UB = Unusual Beliefs and Experiences; ECC = Eccentricity; CPD = Cognitive and Perceptual Dysregulation;
